# Bigger Is Fitter? Quantitative Genetic Decomposition of Selection Reveals an Adaptive Evolutionary Decline of Body Mass in a Wild Rodent Population

Bonnet Timothée<sup>1,\*</sup>, Wandeler Peter<sup>1,2</sup>, Camenisch Glauco<sup>1</sup>, Postma Erik<sup>1,3</sup>

**1 Department of Evolutionary Biology and Environmental Studies, University of Zurich, Zurich, Switzerland**

**2 Natural History Museum Fribourg, Fribourg, Switzerland**

**3 Centre for Ecology and Conservation, College of Life and Environmental Sciences, University of Exeter, Cornwall Campus, Penryn, United Kingdom**

\* [timothee.bonnet@ieu.uzh.ch](mailto:timothee.bonnet@ieu.uzh.ch)

## Abstract

In natural populations, quantitative trait dynamics often do not appear to follow evolutionary predictions: Despite abundant examples of natural selection acting on heritable traits, conclusive evidence for contemporary adaptive evolution remains rare for wild vertebrate populations, and phenotypic stasis seems to be the norm. This so-called ‘stasis paradox’ highlights our inability to predict evolutionary change, which is especially concerning within the context of rapid anthropogenic environmental change. While the causes underlying the stasis paradox are hotly debated, comprehensive attempts aiming at a resolution are lacking. Here we apply a quantitative genetic framework to individual-based long-term data for a wild rodent population and show that despite a positive association between body mass and fitness, there has been a genetic change towards lower body mass. The latter represents an adaptive response to

viability selection favouring juveniles growing up to become relatively small adults, i.e. with a low *potential* adult mass, which presumably complete their development earlier. This selection is particularly strong towards the end of the snow-free season, and it has intensified in recent years, coinciding with a change in snowfall patterns. Importantly, neither the negative evolutionary change, nor the selective pressures that drive it, are apparent on the phenotypic level, where they are masked by phenotypic plasticity and a non-causal (i.e. non-genetic) positive association between body mass and fitness, respectively. Estimating selection at the genetic level thereby enabled us to uncover adaptive evolution in action, and to identify the corresponding phenotypic selective pressure. We thereby demonstrate that natural populations can show a rapid and adaptive evolutionary response to a novel selective pressure, and that explicitly (quantitative) genetic models are able to provide us with an understanding of the causes and consequences of selection that is superior to purely phenotypic estimates of selection and evolutionary change.

## Introduction

Given the rapid anthropogenic environmental changes experienced by organisms around the world, there is an increasing need for an ability to understand and predict the evolutionary dynamics of wild populations [1,2]. Despite good empirical examples of the adaptive evolution of traits with a simple genetic architecture [3–5], the picture is very different for quantitative traits, which in most cases are a function of many genes of small effect [6]. Although these are the traits that are of most interest to evolutionary biologists [7,8], predictive models of quantitative trait evolution have largely failed when applied to data from wild populations [9].

Although there is an abundant literature showing that both directional selection [10,11] and heritable genetic variation [12,13] are common, these pre-requisites of Darwinian evolution rarely allow us to explain evolutionary trends retrospectively, let alone to make predictions for the future [9,14]. For example, both natural and sexual selection almost universally favour larger and heavier individuals [15]. Furthermore, size-related traits are generally moderately heritable [12,13], and averaged across the 151 estimates compiled in [13], the heritability of body mass is  $0.33 \pm 0.02$ . These levels

of directional selection and heritability generate an expectation of rapid evolution of  
larger body size. Nevertheless, while species do tend to get larger over geological  
timescales [16–19], this rate of evolution is orders of magnitude slower than predicted  
from the strength of selection and heritability observed in contemporary  
populations [9, 20, 21].

On the whole, conclusive evidence for the contemporary adaptive evolution of  
quantitative traits in wild vertebrate populations is remarkably scarce and elusive [9, 14],  
and good examples —Trinidadian guppy life-histories [22], human reproductive timing  
and educational attainment [23, 24], timing of pink salmon migration [25] and big-horn  
sheep horn size [26]—can be counted on the fingers of one hand. Furthermore, of these  
studies, those dealing with humans might not be representative of wild populations, [26]  
reported a response to harvesting-induced, artificial rather than natural selection, and  
despite considerable effort to uncover any evolutionary consequences of climate  
change [2, 27–29], only [25] were able to demonstrate an adaptation to climate.

Our apparent inability to reconcile predictions of evolutionary change based on  
estimates of selection and genetic variation with the (lack of) of phenotypic change  
observed, i.e. the ‘stasis paradox’ [9], is a major concern in urgent need of a resolution.  
Given how commonly evolutionary predictions fail to capture observed trait dynamics,  
some have concluded that there are fundamental problems that prohibit the application  
of quantitative genetic methods to natural populations [30, 31]. However, there are in  
fact three theoretically well-developed (quantitative genetic) explanations for this  
mismatch.

First, many studies base their conclusion of evolutionary stasis on the observed  
phenotypic trend not being significantly different from zero, but they do not explicitly  
compare the observed change to the change predicted [32]. Hence, at least some cases of  
phenotypic stasis may be the result of a lack of statistical power. Additionally,  
evolutionary change does not need to be apparent at the phenotypic level. Instead, it  
may be masked by phenotypically plastic changes, which may be several-fold larger  
and/or go opposite to the genetic change [33]. For instance, while a change in the  
environment may generate selection favouring an increase in the frequency of alleles  
promoting fat accumulation, at the same time this may create a food shortage, leading  
to a plastic decrease of fat reserves. As a consequence, an evolutionary trend may be

masked by a counteracting plastic change, resulting in “cryptic evolution” [34,35]. 48

Second, the observed rates of phenotypic change (which as outlined above may 49  
provide poor estimates of evolutionary change) are typically compared to predictions 50  
from the univariate breeder’s equation, i.e. the product of selection and heritability, 51  
where selection is quantified as the phenotypic covariance between the trait of interest 52  
and fitness. In natural systems, selection however rarely acts on traits in isolation [36]. 53  
If these traits are genetically correlated to the focal trait, they may significantly alter 54  
the focal trait’s evolutionary trajectory [37,38]. While the role of genetic correlations 55  
among traits within the same individual [39] or between the sexes [40] has received 56  
substantial attention, the potential role of genetic constraints resulting from genetic 57  
correlations between traits expressed in different life-stages has received far less 58  
attention. In particular parent-offspring conflict, e.g. a genetic trade-off between 59  
offspring quality and fecundity [41], may constrain the evolution of size [42], with 60  
positive directional selection on offspring size counterbalancing selection against 61  
investment per offspring on the level of parents [43]. 62

Finally, even in the absence of selection on correlated traits, it is challenging to 63  
obtain an estimate of the strength of natural selection that is unbiased by the existence 64  
of a third, non-genetic variable that influences both the trait and fitness [44]. Although 65  
the univariate breeder’s equation assumes that the covariance between phenotype and 66  
fitness is solely the result of a causal relationship between the two, this assumption is 67  
likely to be violated, especially in natural populations [14,45]. For instance, a trait that 68  
plastically responds to food availability, such as body mass, is likely to covary with 69  
fitness at the phenotypic level, irrespective of the causal effects of this trait on fitness: 70  
individuals that have access to more food are heavier and reproduce more [37,46]. 71  
However, because the fitter individuals are not genetically different in terms of body 72  
mass, this covariation has no evolutionary consequences, even if body mass is 73  
heritable [44]. 74

While these difficulties have been discussed previously, and studies regularly note 75  
that the mismatch between the observed and predicted response may be attributable to 76  
any of them, they are rarely accounted for in an explicit, quantitative manner. 77  
Therefore, we here apply a comprehensive analytical framework to long-term 78  
individual-based body mass data for a wild rodent population, which appear to show a 79

mismatch between the observed rate of phenotypic change and the predicted rate of genetic change. To resolve this mismatch, we use information on within-population relatedness and individual-level trait measurements [47, 48] to obtain a statistically robust estimate of the direction and rate of genetic change [14, 49, 50]. Subsequently we disentangle the role of genes and the environment in shaping the covariance between body mass and fitness, and identify the likely target of selection. This allows us to directly compare the observed genetic change to a range of evolutionary predictions, and to thereby resolve the stasis paradox and provide a deeper understanding of selection and evolution in this system.

## Results and discussion

Based on ten years of data on an alpine population of snow voles [51, 52] (*Chionomys nivalis*, Martin 1842), we find that relatively heavy individuals both survive better ( $p = 0.04$ ) and produce more offspring per year ( $p = 0.003$ ). Assuming causality, this generates strong phenotypic selection favouring heavier individuals (selection differential  $S = 0.86$  g,  $p < 10^{-5}$ ; mean adult mass = 41.7 g, standard deviation = 5.2 g). In line with other morphological traits [12, 13], variation in body mass has a significant additive genetic component ( $V_A = 4.34$  g<sup>2</sup>, 95%CI [2.40;7.36]), which corresponds to a heritability ( $h^2$ ) of 0.21 (95%CI [0.11;0.29]). Similarly, we find significant additive genetic variance in fitness ( $V_A = 0.10$ ; 95%CI [0.06;0.19],  $h^2 = 0.06$  95%CI [0.04;0.12]), measured as relative lifetime reproductive success (rLRS).

Given these estimates of selection ( $S$ ) and heritability ( $h^2$ ), and after normalizing by a mean generation time of 1.2 years, the breeder's equation ( $R = h^2 S$ ) predicts an adaptive evolutionary response ( $R$ ) in body mass [14, 48], i.e. an increase in the mean breeding value for body mass over time, of 0.17 g/year (95%CI [0.07;0.28]; Fig 2A UBE, Univariate Breeder's Equation). However, over the past nine years (approximately eight generations), the change in mean body mass is not significant and small at best (0.08 g/y; 95%CI [-0.02;0.18];  $p = 0.14$ ) after correcting for changes in demographic structure (i.e. accounting for sex and age effects, see Fig 1A and S1). This apparent mismatch between the predicted increase in body mass based on the breeder's equation and the absence of a strong and statistically significant phenotypic change would appear to

provide yet another example of the stasis paradox [9].

To test whether the predicted positive genetic trend, i.e. an increase in breeding values, is being masked by the effects of phenotypic plasticity [9, 35], we directly estimated the additive genetic covariance between mass and fitness. Based on the Robertson-Price's equation, this provides an unbiased estimate of the rate of genetic change per generation [14, 53, 54]. Contrary to the predicted evolutionary increase in body mass, this estimate of genetic change in mass is strongly negative and highly significant ( $p_{\text{MCMC}} < 0.001$ ; Fig 2A GCPE, Genetic Change Price Equation). When normalized by a mean generation time of 1.2 years, this provides a rate of evolutionary change of -0.29 g/year (95%CI [-0.55; -0.07]) or approximately 7,300 Darwins (the natural logarithm of the proportional change in trait value over a million years [55]), which is in line with other estimated rates of "micro-evolution" (e.g. between 3,700 and 45,000 Darwins in the Trinidadian guppies [56]). Importantly, this rate of evolution is unlikely to have happened solely through genetic drift ( $p_{\text{MCMC}} < 0.001$ ; Fig S2 and S3) [50], and therefore most likely reflects a response to selection favouring genetically lighter individuals.

The above result was confirmed by an independent estimate of the rate of evolution using best linear unbiased predictors (BLUPs) of breeding values for mass: Taking into account the non-independence of BLUPs and sampling variance [49, 50], we find that predicted breeding values have likely declined over the past nine years (-0.07 g/year, 95%CI [-0.16; 0.01],  $p_{\text{MCMC}}=0.06$ ; Fig 1B & Fig 2A TPBV, Trend in Predicted Breeding Values), and this despite the BLUPs approach being potentially biased towards the phenotypic trend [49] (i.e. in this case towards zero). This negative trend, combined with the fact that the phenotypic mean has either remained constant or has shown a slight increase (see above), implies that the plastic component of body mass must have increased. Although the cause of this increase remains unknown, population size has declined over the study period (Fig S1), which may have resulted in an increase in the per-capita resource availability (i.e. density dependence). Alternatively, the absolute food availability or quality may have improved. Interestingly, although these environmental changes may be coincidental, they may also be a direct result of a change in the selection regime or the evolutionary change toward smaller size [35, 57].

As the phenotypic selection differential ( $\sigma_P(m, \omega)$ ), i.e. the phenotypic covariance

between body mass  $m$  and fitness  $\omega$ , measured as relative lifetime reproductive success (rLRS)) is equal to the sum of the additive genetic and environmental covariances between mass and fitness ( $\sigma_A(m, \omega)$  and  $\sigma_E(m, \omega)$ ), respectively [14, 53, 54, 58, 59], it follows that because  $\sigma_P(m, \omega)$  is positive and  $\sigma_A(m, \omega)$  is negative, the environmental covariance must be large and positive (Fig 2B LRS). In other words, while environmental conditions that make voles heavy (for instance abundance of food or lack of parasites) also make them successful at reproducing and surviving, there is no causal *positive* relationship between breeding values for mass and fitness. It is this difference in sign between  $\sigma_A(m, \omega)$  and  $\sigma_E(m, \omega)$  that represents an extreme violation of the assumption of the breeder's equation that  $\sigma_A(m, \omega)/V_A = \sigma_E(m, \omega)/V_E$  [44]. Hence, our initial prediction of evolution based on phenotypic estimates of selection was wrong, illustrating how these may provide severely biased predictions of the evolutionary trajectories of wild populations. But *why* is evolution taking place in a direction that is opposite to apparent phenotypic selection?

Indirect selection may be acting on body mass through one or more traits genetically correlated to mass [36, 38]: a positive selective pressure on a negatively correlated trait (or a negative selective pressure on a positively correlated trait) would indirectly select for lower mass. However, the genetic correlations among the three morphological traits for which we have data—body mass ( $m$ ), body length ( $b$ ) and tail length ( $t$ )—are all positive (estimates and 95%CI:  $\rho_{m,b} = 0.79$  [0.06; 0.93];  $\rho_{m,t} = 0.40$  [0.01; 0.66];  $\rho_{t,b} = 0.56$  [-0.04; 0.85]), and direct selection is positive for two of them and only slightly negative for one of them (see table S1). Hence, the predicted response based on the multivariate breeder's equation (Fig 2A MBE, Multivariate Breeder Equation) is very similar to that based on its univariate counterpart (Fig 2A UBE), as well as to that based on a multivariate breeder's equation constraining the correlations to zero (Fig 2A MBE $_{\rho=0}$ ). Therefore, the genetic correlations among the traits considered do not constrain the evolution of body mass and do not explain the trend towards lower body mass. To test whether parent-offspring conflict between size and fertility might be constraining the evolution of size, we furthermore estimated the genetic correlation between juvenile size and adult annual reproductive success, which should be negative for it to provide a constraint [43]. Although we were not able to incorporate all sources of uncertainty into the estimation of this correlation (see Methods), our best estimate

was 0.21, 95%CI [-0.24; 0.74]), which argues against a major role for a trade-off between fertility and offspring size in driving the observed evolution toward smaller sizes.

To pursue the possibility that the counter-intuitive direction of evolution was due to selective pressures directly acting on body mass, we first tested which fitness component is negatively associated with genes for being heavy. Computing sex- and age-specific genetic covariances between mass and fitness components revealed that whereas the genetic covariances between mass and both relative annual reproductive success and adult survival are close to zero in both sexes (Fig 2B), the genetic covariance between mass and over-winter survival is negative in juveniles (-0.98 [-2.44;-0.18] on a logit scale,  $p_{\text{MCMC}}=0.01$ ). Because the genetic correlation between juvenile and adult mass is positive ( $r_A = 0.88$ ; 95%CI [0.39;1]) and significantly different from 0 ( $p=0.004$ ) but not 1 ( $p=0.35$ ), selection on juvenile mass can shape genetic variance for mass at all ages, and thereby contribute to the observed negative genetic change [60]. While this shows that negative viability selection of juvenile mass is responsible for the genetic change toward smaller individuals, how come survival is higher for heavier phenotypes *and* lighter genotypes?

Juvenile mass covaries positively with both within- and between-year survival ( $p = 0.009$  and  $p = 1.3 \times 10^{-6}$ , respectively). However, juveniles can only be captured when they first leave their burrow, at an age of approximately three weeks [61], when they weigh 12 to 20 g. They may however continue to be captured until the end of the season, when they can reach weights of up to 50 g. Because of growth, mass measurements are therefore not directly comparable among juveniles of different ages. Indeed, at least part of the positive phenotypic relationship between juvenile mass and survival probability is likely to be mediated by the fact that both increase with age [62]. In addition, viability selection introduces non-random missing data, which further biases estimates of viability selection on mass [62, 63]. Therefore, the positive phenotypic association between juvenile body mass and survival is unlikely to be the result of an among-individual covariation of survival probability and mass, and hence provides a poor representation of selection.

The (co)variance decompositions presented above have the advantage that they do not make causative statements. For example, a genetic covariance describing the rate of evolution has a self-contained, tautological, meaning and does not make any assumptions



with respect to its causes [64]. However, if we are to identify the target of juvenile viability selection, we must adopt a more traditional hypothesis testing framework. This is somewhat complicated by our relatively poor understanding of snow vole biology, much of which takes place below the rocks or the snow, and the impossibility to carry out manipulative experiments in a natural setting. Although this means that the scenario detailed below is in part speculative, it is well-supported by our data.

We hypothesised that juveniles with a low *potential adult* mass, i.e. juveniles that will grow up to be relatively small adults (*if* they survive), require less time to reach their adult size. Furthermore, when the period favourable for growth is limited, and juveniles that have not completed development before the arrival of winter pay a survival cost, for example due to trade-offs between growth and vital physiological processes [65,66], survival selection will favour juveniles that need less time to reach their adult size. This scenario generates selection for small size, especially for juveniles born toward the end of the season (Fig 3A and Fig S4), and gives rise to a negative genetic association between mass and survival. On the phenotypic level this negative selection would however be masked by the positive within-individual age-related association between mass and survival (see above).

Although, as we emphasised above, inferring a causal relationship between a trait and fitness based on their covariance requires great care, we set out to obtain an estimate of viability selection that is unbiased by growth and non-random missing data due to mass-dependent mortality occurring after the first capture [62]. To this end we used a Bayesian model to simultaneously infer birth dates and growth curves for all juveniles observed at least once. Although we cannot account for viability selection acting before the first capture, this model enabled us to quantify viability selection on age-corrected juvenile mass—i.e. asymptotic or predicted adult mass—, and thereby compare all individuals at the same developmental stage (adulthood), irrespective of their fate. Inferred birth dates revealed that snow fallen during the preceding winter is a major ecological factor constraining the onset of reproduction in spring, with reproduction starting on average 40 days after the snow has melted (SE 4.5,  $p = 4 \times 10^{-5}$ ) (Fig 3B). As a consequence, juveniles only have a limited amount of time to grow and reach their adult mass before the return of winter. As growth rate and predicted adult mass are only weakly (and negatively) correlated (correlation  $-0.077$ ;

95%CI [-0.150; -0.002]), juveniles with a smaller adult mass on average require less  
time to complete development. The strength of survival selection acting on predicted  
adult mass was slightly negative when averaged over all years and the complete  
reproductive season ( $p_{\text{MCMC}}=0.13$ ), but interacted strongly and significantly with the  
number of days between birth and the first snowfall of that year (interaction = 0.0025,  
95%CI [0.0001; 0.0048]  $p_{\text{MCMC}}=0.008$ ; for other effects see table S2). This implies that  
individuals born closer to the first snowfall are more strongly selected for a low adult  
mass, and that the length of the snow-free period in a given year determines the total  
selection experienced by the population in that year.

At our field site, the length of the snow-free period in the years 2008 to 2014 has  
been significantly shorter than during the preceding seven years (Fig 3C). The latter  
coincides with a period of exceptionally high snowfall, low temperatures and a long  
duration of snow cover, across the Swiss Alps [67]. Our model estimates that in 2006  
and 2007, when the snow-free period was long, most juveniles reached their adult mass  
before the first snowfall, and there was hence no selection on predicted adult mass  
( $\beta = -0.002$ , SE= 0.0006,  $p_{\text{MCMC}}=0.47$ , Fig 3D; D; S4). However, in all subsequent  
years, the snow-free period was much shorter, and there was selection for a lower  
predicted adult mass ( $\beta = -0.10$ , SE=0.0008,  $p_{\text{MCMC}}=0.009$ ). This suggests that the  
shortening of the snow-free season, and thereby selection for lower predicted adult mass,  
is a novel phenomenon that the population is currently in the process of adapting to.  
Assuming that the additive genetic variation in potential adult mass is similar to the  
additive genetic variation in mass (4.34 g<sup>2</sup>, see above), the breeder's equation  
( $R = \beta V_A$ ) predicts a response to selection on potential adult mass between -0.72 and  
-0.24 g/year (from 2008 and 2014) which is in line with the observed rate of body mass  
evolution (-0.29 g/year [-0.55; -0.07] from 2006 to 2014).

Model complexity and data availability prohibit rigorously disentangling genetic and  
environmental sources of variation in predicted adult mass among individuals and over  
time. Therefore we cannot rule out the possibility that the selective pressure we  
identified is not causative [68], nor can we rule out other selective forces contributing to  
the observed evolution. Nevertheless, the hypothesis presented here is consistent with  
observations: The cohort born in 2013 had an estimated adult mass that was 1.02 g  
smaller than the cohort born in 2006 ( $p=0.05$ ). This decline in mass is predicted to

have increased population-level juvenile survival by 2.5%, and may have contributed 270  
positively to population recovery (Fig S1). 271

## Conclusion 272

We have exploited a case of apparent evolutionary stasis to gain a deeper insight into 273  
the evolutionary dynamics of natural populations, and the selective pressures that shape 274  
them. Whereas estimates of selection and evolution based on phenotypic data alone can 275  
easily mislead our understanding of the selective and evolutionary processes in natural 276  
populations, a quantitative genetic framework applied to individual-based long-term 277  
data allows us to unravel evolutionary and environmental changes over time, and to 278  
obtain unbiased estimates of selection. This has resolved a case of apparent evolutionary 279  
stasis, providing a comprehensive empirical demonstration of contemporary adaptive 280  
evolution in response to a climatic fluctuation. 281

## Methods 282

**Snow vole monitoring.** Monitoring of the snow vole population began in 2006 and 283  
the present work uses data collected until the fall of 2014. The snow vole monitoring 284  
was authorised by the *Amt für Lebensmittelsicherheit und Tiergesundheit*, Chur, 285  
Switzerland. The study site is located at around 2030m above sea level, in the central 286  
eastern Alps near Churwalden, Switzerland (46°48' N, 9°34' E). The site consists of 287  
scree, interspersed with patches of alpine meadows and surrounded by habitat 288  
unsuitable for snow voles: a spruce forest to the West, a cliff to the East and large 289  
meadows to the North and South. In accordance with it being considered a 290  
rock-dwelling specialist [61], at our study site snow voles were almost never captured 291  
outside of the rocky area. Given that it is ecologically fairly isolated, we were able to 292  
monitor the whole population. Trapping throughout the whole study area took place 293  
during the snow-free period, between late May and mid-October. One trapping session 294  
consisted of four trapping nights. Analyses presented here are based on a total of two (in 295  
one year), three (in three years) or five (in five years) trapping sessions per season. All 296  
newly-captured individuals weighing more than 14 g were marked with a subcutaneous 297

passive transponder (PIT, ISO transponder, Tierchip Dasmann, Tecklenburg). 298  
Additionally, an ear tissue sample was taken (maximum 2 mm in diameter) using a 299  
thumb type punch (Harvard Apparatus) and stored in 100% ethanol at  $-20^{\circ}\text{C}$ . DNA 300  
extracted from these samples was genotyped for 18 autosomal microsatellites developed 301  
for this population [69], as well as for the *Sry* locus to confirm the sex of all individuals. 302  
Finally, another Y-linked marker as well as a mitochondrial marker was used check for 303  
errors in the inferred pedigree (see below). An identity analysis in CERVUS v.3.0 [70] 304  
allowed us to identify animals sampled multiply, either because they lost their PIT, or 305  
because at their first capture as a juvenile they were too small to receive a PIT. Over 306  
the study period we obtained 3382 captures of 937 individuals (see Fig SI5). All the 307  
analyses were carried out in R [71]. Specific packages are referenced below. 308

**Pedigree inference.** Parentage was inferred by simultaneously reconstructing 309  
paternity, maternity and sibship using a maximum likelihood model in 310  
*MasterBayes* [72]. Parentage was assigned using a parental pool of all adults present in 311  
the examined year and the previous year, assuming polygamy and a uniform genotyping 312  
error rate of 0.5% for all 18 loci. As it is known that in rare cases females reach sexual 313  
maturity in their year of birth [61], we matched the genotypes of all individuals against 314  
the genotypes that can be produced by all possible pairs of males and females. We 315  
retrieved the combinations having two or less mismatches (out of 18 loci) and ensured 316  
that parental links were not circular and were temporally consistent. This way, we 317  
identified eight young females as mothers of animals born in the same year, with a 318  
known father but a mother not previously identified. All of these females were relatively 319  
heavy ( $>33$  g) at the end of the season and their home-ranges matched those of their 320  
putative offspring. Finally, the pedigree was checked using a polymorphic Y-linked locus 321  
developed for this population [73], as well as a fragment of the mitochondrial DNA 322  
control region, amplified using vole specific primers [74]. There were no inconsistencies 323  
between the transmission of these three markers and the reconstructed pedigree. 324  
Although the study periods spans over 7.5 times the mean generation time, the final 325  
pedigree had a maximum depth of 11 generations (one for each of the nine years of 326  
monitoring, plus one for the unobserved parents of siblings that could be inferred in the 327  
first year, plus one due to the reproduction of a few females in the same year they were 328

born) and a mean depth of 3.8 generations. The pedigree consists of 987 individuals (more than the number of captured individuals because the pedigree contained the unobserved parents of some full-siblings that could be reliably inferred), 458 full-sibling pairs, 3010 half-sibling pairs, 764 known maternities and 776 known paternities, so that, excluding the base population, 86% of the total parental links were recovered.

**Traits.** The recapture probability from one trapping session to the next was estimated to be 0.924 (SE 0.012) for adults and 0.814 (SE 0.030) for juveniles using mark-recapture models. Thus, with three trapping session a year, the probability not to trap an individual present in a given year is below  $10^{-3}$ . Not surprisingly, no animal was captured in year  $y$ , not captured in  $y + 1$ , but captured or found to be a parent of a juvenile in  $y + 2$  or later. Therefore, capture data almost perfectly matches over-winter survival. However, as is almost always the case in these type of studies, we are unable to separate death from permanent emigration. Importantly however, as both have the same consequences on the population level, this does not affect our evolutionary predictions.

Annual and lifetime reproductive success (ARS and LRS, respectively) were defined as the number of offspring attributed to an individual in the pedigree, either over a specific year or over its lifetime. 56 individuals born of local parents were not captured in their first year, but only as adult during the next summer, probably because they were born late in the season and we had only few opportunities to catch them. This means that we miss a fraction of the juveniles that are not observed in their first year and die, or emigrate, during the following winter. We acknowledge that this means that our measures of ARS and LRS partly conflate adult reproductive success and the viability of those juveniles that were never observed, but our measures are the most complete measures of reproductive success available in this system.

In order to estimate total selection, we used relative LRS ( $\omega$ ) as proxy for fitness [36], where  $\omega_i = \frac{\text{LRS}_i}{\frac{1}{N_{s,t}} \sum_{j=1}^{N_{s,t}} \text{LRS}_{j,t}}$ . Here,  $N_{s,t}$  is the number of individuals of same sex as the focal individual  $i$ , present in the cohort  $t$ , so that  $\frac{1}{N_{s,t}} \sum_{j=1}^{N_{s,t}} \text{LRS}_{j,t}$  is the sex-specific, cohort-specific mean of LRS. The latter is required as the mean LRS differs between males and females due to imperfect sampling [14]. We used cohort-specific means in order to account for variations in population growth rate. In addition, to estimate the viability and fertility component of total selection, we used

ARS and survival, standardized by their sex- and year-specific means. 360

Generation time was defined as the mean age of parents at birth of their 361  
offspring [75] and used to convert the predictions and estimations of evolution into 362  
grams per year. 363

Mass ( $m$ ) was measured to the nearest gram with a spring scale. Both body length 364  
( $b$ ), measured from the tip of the nose to the base of the tail, and tail length, measured 365  
from the tip to the base of the tail ( $c$ ), were measured to the closest mm with a calliper 366  
while holding the animal by the tail. 367

**Selection.** Selection differentials were estimated using bivariate linear mixed models, 368  
as the individual-level covariance between fitness (i.e. relative LRS for total selection, 369  
relative ARS for fertility selection and relative survival for viability selection) and mass 370  
(corrected for sex, age and cohort). However, while this provides the best estimate of the 371  
within-generation change in trait mean due to selection [36], because the distribution of 372  
fitness is not Gaussian, the credibility intervals produced by these models are not exact. 373  
Hence, the statistical significance of selection was tested using a univariate 374  
over-dispersed Poisson generalized linear mixed model (GLMM) in which LRS was 375  
modelled as a function of individual standardized mass and including sex and age as 376  
covariates and cohort as a random effect. Note that the latter estimates the effect of 377  
mass on a transformed scale, and therefore cannot be directly used to quantify an effect 378  
of selection on the original scale measured in grams [76]. The significance based on the 379  
basis of the GLMM was confirmed by non-parametric bootstrapping. Similarly, we 380  
tested for the significance of selection through ARS only, using an over-dispersed Poisson 381  
GLMM including sex as a fixed effect, and year and individual as random effects. 382

The estimation of survival selection is facilitated by the fact that the year-to-year 383  
individual recapture probability is effectively 1. Therefore, selection on year-to-year 384  
survival was tested for by a binomial GLMM. This model included sex, age and their 385  
interaction as fixed effects, and year as a random effect. 386

In order to integrate the uncertainty in the estimation of selection with the 387  
uncertainty in the estimation of heritability when predicting the rate of evolution, 388  
selection differentials and gradients were also obtained from the multivariate animal 389  
model presented below. 390

**Quantitative genetic analyses.** We used uni- and multivariate animal models to estimate additive genetic variances, covariances and breeding values [48, 77, 78] with MCMCglmm [79]. All estimations were carried out in a Bayesian framework in order to propagate uncertainty when computing composite statistics such as heritabilities and rates of genetic change [58]. All estimates provided in the text are posterior modes and credibility intervals are highest probability density intervals at the 95% level. All the animal models were run for 1,300,000 iterations with a burnin of 300,000 and a thinning of 1,000, so that the autocorrelations of each parameter chain was less than 0.1. Convergence was checked graphically and by running each model twice.

**Univariate models:** We first carried out univariate model selection, fitting models without an additive genetic effect, to determine which fixed and random effects to include. Based on AICc [80], and fitting the models by Maximum of Likelihood in lme4 [81], we obtained a model that predicts the mass  $m_{i,t}$  of individual  $i$  at time  $t$  by: age, as a factor (juvenile or adult); sex as a factor; the interaction between age and sex; Julian dates and squared Julian dates (in order to correct for population-level seasonal variation in mass: individuals of all sexes and ages tend to be heavier in the middle of summer and lighter in spring and fall, possibly as a result of food abundance), which were centered and divided by their standard deviations in order to facilitate convergence; the interaction between age and Julian date; the interaction between sex and Julian date; the three way interaction between age, sex and Julian dates; a random intercept for individual, i.e. permanent environment; and a random intercept for year. The inclusion of year accounts for non-independence of observation within years, while the permanent environment random effect accounted for the non-independence of repeated measurements made on the same individual [82].

We then fitted an animal model by adding a random intercept modelling variance associated with mother identity [78], and a random intercept modelling additive genetic variance. Although it was not included in the best models, we kept inbreeding coefficient (estimated from the pedigree) as a covariate, because leaving it out could bias the later estimation of additive genetic variation [83]. Nevertheless, animal models fitted without this covariate gave indistinguishable estimates. The univariate animal model for body mass can be written as:

$$\mathbf{m} \sim \mathbf{bX} + \mathbf{D}_1\mathbf{a} + \mathbf{D}_2\boldsymbol{\mu} + \mathbf{D}_3\mathbf{p} + \mathbf{D}_4\mathbf{y} + \mathbf{Ir}. \quad (1)$$

Here  $\mathbf{X}$ ,  $\mathbf{D}_1$ ,  $\mathbf{D}_2$ ,  $\mathbf{D}_3$  and  $\mathbf{D}_4$  are design matrices relating observations to the parameters to estimate,  $\mathbf{b}$  is a matrix of fixed effects,  $\mathbf{a}$ ,  $\boldsymbol{\mu}$ ,  $\mathbf{p}$  and  $\mathbf{y}$  are random effects accounting for the variance associated with breeding value, mother, permanent environment (i.e. individual repeatability) and year, respectively.

The most important aspect of this model is that  $\mathbf{a}$ , the matrix of breeding values, follows a multivariate normal distribution:

$$\mathbf{a} \sim MVN(\mathbf{0}, \mathbf{A} \times \sigma_A^2(m)) \quad (2)$$

where  $\mathbf{A}$  is the relatedness matrix describing the relatedness among all individuals, and  $\sigma_A^2(m)$  is the additive genetic variance in body mass. For univariate animal models for each random effect we used a vague proper prior with the variance parameter set to 1 and the degree of belief set to 0.002.

**Multivariate models:** Univariate animal models can be expanded to multivariate models in order to estimate genetic correlations, genetic gradients and genetic differentials between body mass ( $m$ ), body length ( $l$ ), tail length ( $t$ ) and fitness ( $\omega$ ).

$$[\mathbf{m}, \mathbf{l}, \mathbf{t}, \boldsymbol{\omega}] \sim \mathbf{bX} + \mathbf{D}_1\mathbf{a} + \mathbf{D}_2\boldsymbol{\mu} + \mathbf{D}_3\mathbf{p} + \mathbf{D}_4\mathbf{y} + \mathbf{Ir}. \quad (3)$$

The fixed part of the model matches that used for each trait in univariate models. We used parameter-expanded priors for the variance components in order to facilitate convergence of parameters that were close to zero [79]. The working parameter prior was normally distributed, with a mean of 0 and a variance of 1000. For  $\omega$ , the residual variance was set to zero in the model, so that the residual variance in fitness is estimated by the permanent environment random effect. Although fitness is measured only once per individual, this allows the estimation of the covariance between fitness and the non-additive genetic repeatable component of trait variation, that the



environmental component of selection [14]. We assumed a Gaussian distribution for fitness so that covariances between traits and fitness could be directly interpreted as selection differentials [76].

The matrix of breeding values ( $\mathbf{a}$ ) here follows a multivariate normal distribution:

$$\mathbf{a} \sim MVN(\mathbf{0}, \mathbf{A} \otimes \mathbf{G}) \quad (4)$$

where  $\mathbf{A}$  is the relatedness matrix describing the relatedness among all individuals, and  $\mathbf{G}$  is the G-matrix, containing the additive genetic variances and covariances among all traits.

$$\mathbf{G} = \begin{pmatrix} \sigma_A^2(m) & \sigma_A(m, l) & \sigma_A(m, t) & \sigma_A(m, \omega) \\ \sigma_A(m, l) & \sigma_A^2(l) & \sigma_A(l, t) & \sigma_A(l, \omega) \\ \sigma_A(m, t) & \sigma_A(l, t) & \sigma_A^2(t) & \sigma_A(t, \omega) \\ \sigma_A(m, \omega) & \sigma_A(l, \omega) & \sigma_A(t, \omega) & \sigma_A^2(\omega) \end{pmatrix}. \quad (5)$$

For any trait  $z$ ,  $\sigma_A(z, \omega)$  is the genetic differential, that is, the predicted rate of evolutionary change according to Robertson's secondary theorem of natural selection, or Price equation applied to genetic variation [14, 53, 54, 58]. The Price equation is generally presented as a prediction of evolutionary change over the next generation, but it has also been used as a description of change [64, 84, 85]. We use this prediction retrospectively, as an estimation of the mean evolutionary change that has occurred during the study period, which makes the assumption that  $\omega$  is a good measure of fitness, because when "real fitness" is used, the equation is a mathematical tautology, i.e. it is exact [64]. A deviation from this perfect fitness measure could come from random Mendelian segregation or systematic meiosis distortion. Our results were robust to the use of an annualized measure of fitness (annual reproductive success plus twice survival), and to standardizing fitness across all individuals, within years, within cohorts, or within sexes.

For two traits  $z$  and  $y$ , the genetic correlation is  $\frac{\sigma_A(z, y)}{\sigma_A(z)\sigma_A(y)}$ . The vector of selection differentials on the three traits ( $\mathbf{S}$ ) was estimated as the sum of the vectors of covariances between traits and  $\omega$  in the variance-covariance matrices for  $\mathbf{a}$ ,  $\mathbf{p}$ ,  $\mathbf{m}$  and  $\mathbf{r}$ ; which was equivalent to the selection differential computed in the paragraph on selection above. Let  $\mathbf{G}'$  be a subset of  $\mathbf{G}$  excluding the column and the row that

contain  $\omega$ . The vector of selection gradients on the three traits ( $\beta$ ) was estimated as  
( $G' + P' + R'$ ) $^{-1}S$ , where  $P'$  and  $R'$  are the equivalent of  $G'$  for permanent  
environment effects and for residuals, respectively [38, 58]. The prediction of the  
multivariate breeder's equation is obtained by  $\Delta\bar{Z}' = G'\beta$ . In order to visualise the  
effect of the genetic correlations on the predictions of evolution, we also applied a  
multivariate breeder's equation that assumes the genetic correlations to be zero. To this  
end we multiplied the  $G'$  matrix by the identity matrix [38]:  $\Delta\bar{Z}' = (G' \times I)\beta$ . We  
excluded the among-year level covariance from the selection differential and gradients,  
because (i) covariation between mass and fitness at the level of year does not correspond  
to selection as it does not occur among individuals, and (ii) due to the standardization  
of relative fitness at the level of cohorts, the among year variance and covariances  
involving  $\omega$  were effectively zero ( $\sigma_Y^2(\omega) < 10^{-8}$ ).

To investigate the potential role of parent-offspring conflict, we estimated the genetic  
correlation between parental ARS and offspring mass using a bivariate animal model.  
For juvenile mass, we used predicted adult mass (i.e. age-corrected juvenile mass; see  
below). We were not able to incorporate the uncertainty in the estimation of predicted  
adult mass in this model and used the mean of the posterior distribution of each  
individual. The credibility intervals derived from this model are therefore only indicative.  
The model included sex as fixed effect, and random additive genetic, individual identity  
(i.e. permanent environment effects), maternal identity and year effects.

To decompose selection components into environmental and genetic covariances (as  
presented in Fig 2B) we fitted models like the one described in equations (1-3), but  
replacing fitness ( $\omega$ ) by the appropriate fitness components: relative ARS or relative  
survival; and taking the appropriate subset of the data: adult males (ARS $_{\sigma}$ ), adult  
females (ARS $_{\phi}$ ), adults ( $\phi_{Ad}$ ) or juveniles ( $\phi_{Juv}$ ). To estimate readily interpretable  
environmental and genetic covariances between body mass and fitness we again assumed  
a Gaussian distribution of fitness components [76].

**Test of genetic correlations:** We used ASRem1-R [86, 87] to test the genetic  
correlation between mass in adults and in juveniles against 1 and 0, by considering them  
as two separate traits. We first ran an unconstrained model and then reran it with the  
genetic correlation parameter set to 0.99 (and not exactly to 1 because ASRem1 cannot

invert matrices with perfect correlations), or 0 respectively. The fit of the unconstrained  
model was then compared to that of the two constrained models using a likelihood ratio  
test with one degree of freedom [88].

**Birth date and growth prediction:** Using the Bayesian programming  
environment JAGS [89], we fitted a multivariate Bayesian model to mass measurements  
of all 613 juveniles with mass data, and to their overwinter survival. The model  
simultaneously estimated individual growth curves—that is onset of growth (although  
this is referred to as “birth date” hereafter, this actually is the projected time when  
mass was zero, i.e. at conception), individual growth rates and asymptotic masses (i.e.  
predicted adult mass) of all juveniles—and the effect of predicted adult mass on  
overwinter survival. The model clustered juveniles from the same mother born in the  
same year into litters (see e.g. [90] for a similar approach), assuming a maximum of five  
litters per year and assuming that successive litters are at least 20 days apart [61].  
Preliminary model selection, assuming no differences in predicted adult masses among  
individuals, selected a monomolecular growth model ( $\Delta\text{DIC} > 80$ ) over Gompertz and  
logistic models, as defined in [91]. The model accounted for measurement error in mass,  
assuming that the standard deviation of the errors was that observed in animals  
measured multiple times on the same day (2.05g). In order to estimate the overall  
viability selection on predicted adult mass, we performed within the model a logistic  
regression of year-to-year survival on sex and predicted adult mass. In order to test for  
the effect of the length of snow free period on the selection on predicted adult mass, we  
reran the full model including time until the first snow fall and its interaction with  
predicted adult mass in the logistic regression. We use the estimates of these two  
models to predict the survival probability as a function of predicted adult mass for  
every year, or for groups of years, depending on the distribution of birth dates and on  
the timing of the first snow fall.

Three MCMC chains were run for 6,300,000 iterations, with a burnin of 300,000 and  
a thinning of 6,000. Convergence was assessed by visual examination of the traces, and  
by checking that  $\hat{R} < 1.01$ . Convergence was not achieved for the litter affiliations of 25  
individuals as well as for one predicted adult mass, thus introducing a bit more  
uncertainty in the estimations. The fit of the model was assessed using posterior

predictive checks on the predictions of individual masses ( $p=0.46$ ) and survival  
probabilities ( $p=0.49$ ). The JAGS code for this model can be found at  
<https://github.com/timotheenivalis/SelRepSel>.

## Acknowledgements

Thanks to Lauren Richardson, Tim Coulson, Alastair Wilson and Loeske Kruuk for  
constructive comments. Thanks to Wolf U. Blanckenhorn, Jarrod D. Hadfield, Lukas F.  
Keller, Marc Kéry, Hanna Kokko, Chelsea J. Little, Pirmin Nietlisbach, Barbara  
Tschirren and Ashley E. Latimer for comments and discussions on earlier versions of  
this work. Thanks also to the many field assistants. Weather data were provided by  
MeteoSwiss. The snow vole monitoring was authorised by the *Amt für  
Lebensmittelsicherheit und Tiergesundheit*, Chur.

## References

1. Parmesan C. Ecological and evolutionary responses to recent climate change.  
*Annu Rev Ecol Evol Syst.* 2006;p. 637–669.
2. Merilä J, Hendry AP. Climate change, adaptation, and phenotypic plasticity:  
The problem and the evidence. *Evol Appl.* 2014;7(1):1–14.
3. van't Hof AE, Edmonds N, Dalíková M, Marec F, Saccheri IJ. Industrial  
melanism in British peppered moths Has a singular and recent mutational origin.  
*Science.* 2011;332(6032):958–960.
4. Karell P, Ahola K, Karstinen T, Valkama J, Brommer JE. Climate change drives  
microevolution in a wild bird. *Nat Commun.* 2011;2:208.
5. Lamichhaney S, Han F, Berglund J, Wang C, Almen MS, Webster MT, et al. A  
beak size locus in Darwins finches facilitated character displacement during a  
drought. *Science.* 2016;352(6284):470–474.
6. Wellenreuther M, Hansson B. Detecting Polygenic Evolution: Problems, Pitfalls,  
and Promises. *Trends Genet.* 2016;32(3):1–10.

7. Roff Da. A centennial celebration for quantitative genetics. *Evolution*. 2007;61(5):1017–1032. 555  
556
8. Walsh B. Special issues on advances in quantitative genetics: introduction. *Heredity*. 2014;112(1):1–3. 557  
558
9. Merilä J, Sheldon BC, Kruuk LEB. Explaining stasis: microevolutionary studies in natural populations. *Genetica*. 2001;112:199–222. 559  
560
10. Kingsolver JG, Hoekstra JM, Berrigan D, Vignieri SN, Hill CE, Hoang A, et al. The strength of phenotypic selection in natural populations. *American Nat*. 2001;157(3):245–261. 561  
562  
563
11. Kingsolver JG, Diamond SE, Siepielski AM, Carlson SM. Synthetic analyses of phenotypic selection in natural populations: lessons, limitations and future directions. *Evol Ecol*. 2012;26(5):1101–1118. 564  
565  
566
12. Mousseau TA, Roff DA. Natural selection and the heritability of fitness components. *Heredity*. 1987 Oct;59(2):181–197. 567  
568
13. Postma E. Four decades of estimating heritabilities in wild vertebrate populations: improved methods, more data, better estimates? In: Charmentier A, Garant D, Kruuk LEB, editors. *Quantitative genetics in the wild*. 1st ed. Oxford: Oxford University Press; 2014. p. 16–33. 569  
570  
571  
572
14. Morrissey MB, Parker DJ, Korsten P, Pemberton JM, Kruuk LEB, Wilson AJ. The prediction of adaptive evolution: empirical application of the secondary theorem of selection and comparison to the breeder’s equation. *Evolution*. 2012;66(8):2399–2410. 573  
574  
575  
576
15. Blanckenhorn W. The evolution of body size: what keeps organisms small? *Q Rev Biol*. 2000;75(4):385–407. 577  
578
16. Cope ED. *The origin of the fittest : essays on evolution*. New York :D. Appleton,; 1887. [Http://www.biodiversitylibrary.org/bibliography/24160](http://www.biodiversitylibrary.org/bibliography/24160). Available from: 579  
580  
<http://www.biodiversitylibrary.org/item/65400>. 581

17. Alroy J. Cope's Rule and the Dynamics of Body Mass Evolution in North American Fossil Mammals. *Science*. 1998;280(5364):731–734. 582  
583
18. Heim NA, Knope ML, Schaal EK, Wang SC, Payne JL. Cope's rule in the evolution of marine animals. *Science*. 2014;347(6224):867–870. 584  
585
19. Baker J, Meade A, Pagel M, Venditti C. Adaptive evolution toward larger size in mammals. *Proc Natl Acad Sci U S A*. 2015;112(16):5093–5098. 586  
587
20. Bell G. Fluctuating selection: the perpetual renewal of adaptation in variable environments. *Philos Trans R Soc Lond B Biol Sci*. 2010;365(1537):87–97. 588  
589
21. Gotanda KM, Correa C, Turcotte MM, Rolshausen G, Hendry AP. Linking macro-trends and micro-rates: re-evaluating micro-evolutionary support for Cope's rule. *Evolution*. 2015;69:1345–1354. 590  
591  
592
22. Reznick DN, Bryga HA. Life-history evolution in guppies (*Poecilia reticulata*: Poeciliidae). 5. Genetic basis of parallelism in life histories. *Am Nat*. 1996;147(3):339–359. 593  
594  
595
23. Milot E, Mayer FM, Nussey DH, Boisvert M, Pelletier F, Réale D. Evidence for evolution in response to natural selection in a contemporary human population. *Proc Natl Acad Sci U S A*. 2011;108(41):17040–17045. 596  
597  
598
24. Beauchamp JP. Genetic evidence for natural selection in humans in the contemporary United States. *Proc Natl Acad Sci U S A*. 2016;113(28):7774–7779. 599  
600
25. Kovach RP, Gharrett AJ, Tallmon DA. Genetic change for earlier migration timing in a pink salmon population. *Proc R Soc Lond B Biol Sci*. 2012;279(1743):3870–3878. 601  
602  
603
26. Pigeon G, Festa-Bianchet M, Coltman DW, Pelletier F. Intense selective hunting leads to artificial evolution in horn size. *Evol Appl*. 2016 jan;p. in press. 604  
605
27. Charmantier A, Gienapp P. Climate change and timing of avian breeding and migration: evolutionary versus plastic changes. *Evol Appl*. 2014;7(1):15–28. 606  
607

28. Gienapp P, Brommer JE. Evolutionary dynamics in response to climate change. 608  
In: Charmentier A, Garant D, Kruuk LEB, editors. Quantitative genetics in the 609  
wild. Oxford: Oxford University Press, Oxford; 2014. p. 254–273. 610
29. Crozier LG, Hutchings JA. Plastic and evolutionary responses to climate change 611  
in fish. *Evol Appl.* 2014;7(1):68–87. 612
30. Steiner UK, Tuljapurkar S. Neutral theory for life histories and individual 613  
variability in fitness components. *Proc Natl Acad Sci U S A.* 614  
2012;109(12):4684–4689. 615
31. Coulson T, Plard F, Schindler S, Ozgul A, Gaillard JM. Quantitative genetics 616  
meets integral projection models : unification of widely used methods from 617  
ecology and evolution. *arXiv.* 2015;Available from: 618  
<http://de.arxiv.org/abs/1509.01351v1>. 619
32. Houle D, Pélabon C, Wagner G, Hansen TF. Measurement and meaning in 620  
biology. *The Quaterly Review of Biology.* 2011;86(1):3–34. 621
33. Postma E, Visser J, Van Noordwijk AJ. Strong artificial selection in the wild 622  
results in predicted small evolutionary change. *J Evol Biol.* 2007;20:1823–1832. 623
34. Merilä J, Kruuk LE, Sheldon BC. Cryptic evolution in a wild bird population. 624  
*Nature.* 2001;412:76–79. 625
35. Hadfield JD, Wilson AJ, Kruuk LEB. Cryptic evolution: does environmental 626  
deterioration have a genetic basis? *Genetics.* 2011 Apr;187(4):1099–113. 627
36. Lande R, Arnold SJ. The measurement of selection on correlated characters. 628  
*Evolution.* 1983;37(6):1210–1226. 629
37. Schluter D, Price TDP, Rowe L. Conflicting selection pressures and life history 630  
trade-offs. *Proc R Soc Lond B Biol Sci.* 1991;246(1315):11–17. 631
38. Morrissey MB, Walling Ca, Wilson AJ, Pemberton JM, Clutton-Brock TH, 632  
Kruuk LEB. Genetic analysis of life-history constraint and evolution in a wild 633  
ungulate population. *Am Nat.* 2012;179(4):E97– E114. 634

39. Teplitsky C, Robinson MR, Merilä J. Evolutionary potential and constraints in wild populations. In: Charmentier A, Garant D, Kruuk LEB, editors. Quantitative genetics in the wild. 1st ed. Oxford: Oxford University Press; 2014. p. 190–207.
40. Poissant J, Wilson AJ, Coltman DW. Sex-specific genetic variance and the evolution of sexual dimorphism : a systematic review of cross-sex genetic correlations. *Evolution*. 2010;64(1):97–107.
41. Trivers RL. Parent-offspring conflict. *Am Zool*. 1974;14:249–264.
42. Kölliker M, Boos S, Wong JWY, Röllin L, Stucki D, Raveh S, et al. Parent–offspring conflict and the genetic trade-offs shaping parental investment. *Nat Commun*. 2015;6:6850.
43. Rollinson N, Rowe L. Persistent directional selection on body size and a resolution to the paradox of stasis. *Evolution*. 2015;69(9):2441–2451.
44. Rausher MD. The measurement of selection on quantitative traits: biases due to environmental covariances between traits and fitness. *Evolution*. 1992;46(3):616–626.
45. Morrissey MB, Kruuk LEB, Wilson aJ. The danger of applying the breeder’s equation in observational studies of natural populations. *J Evol Biol*. 2010;23(11):2277–88.
46. van Noordwijk AJ. Two-stage selection in which the first stage only reduces the environmental variation in body size in the great tit. In: *Acta XIX Congressus Internationalis Ornithologici, Vol. II*, University of Ottawa Press, Ottawa,; 1988. .
47. Henderson C. Estimation of genetic parameters. *Annals of mathematical statistics*. 1950;21(2):309–310.
48. Lynch M, Walsh B. *Genetics and Analysis of Quantitative Traits*. Sinauer Associates; 1998.
49. Postma E. Implications of the difference between true and predicted breeding values for the study of natural selection and micro-evolution. *J Evol Biol*. 2006;19:309–320.



50. Hadfield JD, Wilson AJ, Garant D, Sheldon BC, Kruuk LEB. The misuse of BLUP in ecology and evolution. *Am Nat.* 2010 Jan;175(1):116–25.
51. García-Navas V, Bonnet T, Waldvogel D, Wandeler P, Camenisch G, Postma E. Gene flow counteracts the effect of drift in a Swiss population of snow voles fluctuating in size. *Biol Conserv.* 2015;191:168–177.
52. Bonnet T, Postma E. Successful by chance? the power of mixed models and neutral simulations for the detection of individual fixed heterogeneity in fitness components. *Am Nat.* 2016;187(1):60–74.
53. Robertson A. A mathematical model of the culling process in dairy cattle. *Animal Production.* 1966;8:95–108.
54. Price GR. Selection and covariance. *Nature.* 1970;227:520–21.
55. Haldane JBS. Suggestions as to Quantitative Measurement of Rates of Evolution. *Evolution.* 1949;3:51–56.
56. Reznick DN, Shaw FH, Rodd FH, Shaw RG. Evaluation of the Rate of Evolution in Natural Populations of Guppies (*Poecilia reticulata*). *Science.* 1997;275:1934–1937.
57. Cooke F, Taylor PD, M FC, Rockwell RF. Directional selection and clutch size in birds. *Am Nat.* 1990;136:261–267.
58. Stinchcombe JR, Simonsen AK, Blows MW. Estimating uncertainty in multivariate responses to selection. *Evolution.* 2014 Apr;68(4):1188–96.
59. Kruuk LEB, Clutton-Brock T, Pemberton JM. Case study: quantitative genetics and sexual selection of weaponry in a wild ungulate. In: Charmentier A, Garant D, Kruuk LEB, editors. *Quantitative genetics in the wild*. 1st ed. Oxford: Oxford University Press; 2014. p. 160–176.
60. Chevin LM. Evolution of adult size depends on genetic variance in growth trajectories: A comment on analyses of evolutionary dynamics using integral projection models. *Methods Ecol Evol.* 2015;6:981–986.

61. Janeau G, Aulagnier S. Snow vole - *Chionomys nivalis* (Martins 1842). IBEX 691  
Journal of Mountain Ecology. 1997;4:1–11. 692
62. Hadfield JD. Estimating evolutionary parameters when viability selection is 693  
operating. Proc R Soc Lond B Biol Sci. 2008 Mar;275(1635):723–34. 694
63. Steinsland I, Larsen CT, Roulin A, Jensen H. Quantitative genetic modeling and 695  
inference in the presence of nonignorable missing data. Evolution. 2014 696  
Jun;68(6):1735–1747. 697
64. Frank SA. Natural selection. IV. The Price equation. J Evol Biol. 698  
2012;25(6):1002–19. 699
65. Stearns SC, Koella JC. The evolution of phenotypic plasticity in life-history 700  
traits: Predictions of reaction norms for age and size at maturity. Evolution. 701  
1986;40(5):893–913. 702
66. Owens IPF, Wilson K. Immunocompetence: A neglected life history trait or 703  
conspicuous red herring? Trends Ecol Evol. 1999;14(5):170–172. 704
67. Beniston M. Is snow in the Alps receding or disappearing? Wiley Interdiscip Rev 705  
Clim Change. 2012;3(4):349–358. 706
68. Morrissey MB. Selection and evolution of causally covarying traits. Evolution. 707  
2014;68(6):1748–61. 708
69. Wandeler P, Ravaioli R, Bucher TB. Microsatellite DNA markers for the snow 709  
vole (*Chionomys nivalis*). Mol Ecol Res. 2008;8:637–639. 710
70. Marshall T, Slate J, Kruuk LEB, Pemberton JM. Statistical confidence for 711  
likelihood-based paternity inference in natural populations. Mol Ecol. 712  
1998;7:639–655. 713
71. R Core Team. R: A Language and Environment for Statistical Computing. 714  
Vienna, Austria; 2014. Available from: <http://www.R-project.org/>. 715
72. Hadfield JD, Richardson DS, Burke T. Towards unbiased parentage assignment: 716  
combining genetic, behavioural and spatial data in a Bayesian framework. Mol 717  
Ecol. 2006 1;15(12):3715–3730. 718

73. Wandeler P, Camenisch G. Identifying Y-chromosomal diversity by long-template PCR. *Mol Ecol Res.* 2011;11:835–841. 719 720
74. Haring E, Herzig-Straschil B, Spitzenberger F. Phylogenetic analysis of Alpine voles of the *Microtus multiplex* complex using the mitochondrial control region. *J Zoolog Syst Evol Res.* 2000;38:231–238. 721 722 723
75. Charlesworth B. Models of age-structured populations. In: *Evolution in Age-Structured Populations*. 2nd ed. Cambridge: University of Cambridge Press; 1994. p. 28–30. 724 725 726
76. Mitchell-Olds T, Shaw RG. Regression analysis of natural selection: statistical inference and biological interpretation. *Evolution.* 1987;41(6):1149–1161. 727 728
77. Henderson CR. *Applications of Linear Models in Animal Breeding*. Guelph: University of Guelph Press; 1984. 729 730
78. Kruuk LEB. Estimating genetic parameters in natural populations using the 'animal model'. *Philos Trans R Soc Lond B Biol Sci.* 2004;359(1446):873–90. 731 732
79. Hadfield JD. MCMC Methods for Multi-Response Generalized Linear Mixed Models: The MCMCglmm R Package. *J Stat Softw.* 2010;33(2):1–22. 733 734
80. Burnham KKP, Anderson DRD. *Model Selection and Multimodel Inference: A Practical Information-Theoretic Approach* (2nd ed). vol. 172. Springer-Verlag, Heidelberg; 2002. 735 736 737
81. Bates D, Mächler M, Bolker B, Walker S. Fitting Linear Mixed-Effects Models Using lme4. *J Stat Softw.* 2015;67(1):1–48. 738 739
82. Kruuk LEB, Hadfield JD. How to separate genetic and environmental causes of similarity between relatives. *J Evol Biol.* 2007 Sep;20(5):1890–903. 740 741
83. de Boer IJM, Hoeschele I. Genetic evaluation methods for populations with dominance and inbreeding. *Theor Appl Genet.* 1993;86:245–258. 742 743
84. Heywood J. An exact form of the breeder's equation for the evolution of a quantitative trait under natural selection. *Evolution.* 2005;59(11):2287–2298. 744 745

85. Coulson T, Tuljapurkar S. The dynamics of a quantitative trait in an age-structured population living in a variable environment. *Am Nat.* 2008;172(5):599–612. 746  
747  
748
86. Gilmour AR, Gogel BJ, Cullis BR, Welham SJ, Thompson R. ASReml User Guide Release 3.0. VSN International Ltd, Hemel Hempstead, UK; 2014. 749  
750
87. Butler DG, Cullis BR, Gilmour AR, Gogel BJ. ASReml-R reference manual; 2009. Draft Copy. 751  
752
88. Wilson AJ, Réale D, Clements MN, Morrissey MM, Postma E, Walling Ca, et al. An ecologist’s guide to the animal model. *J Anim Ecol.* 2009 Jan;79(1):13–26. 753  
754
89. Plummer M. JAGS: A program for analysis of Bayesian graphical models using Gibbs sampling. In: *Proceedings of the 3rd International Workshop on Distributed Statistical Computing*; 2003. . 755  
756  
757
90. Cornulier T, Elston Da, Arcese P, Benton TG, Douglas DJT, Lambin X, et al. Estimating the annual number of breeding attempts from breeding dates using mixture models. *Ecology Lett.* 2009 Nov;12(11):1184–93. 758  
759  
760
91. English S, Bateman AW, Clutton-Brock TH. Lifetime growth in wild meerkats: incorporating life history and environmental factors into a standard growth model. *Oecologia.* 2012 May;169(1):143–53. 761  
762  
763

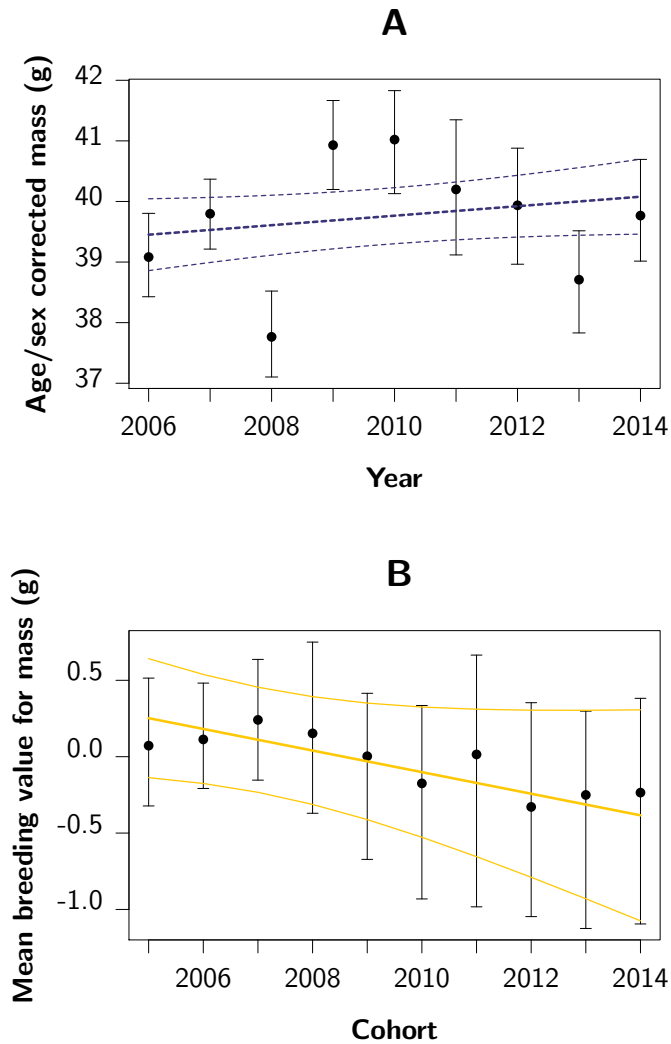

**Figure 1 Temporal variation in mass and estimated breeding values for mass. (A):** Year-specific mean mass corrected for age, sex and date of measurement, with 95%CI. **(B):** Cohort-specific mean estimated breeding value for mass with their 95%CI and the trend in breeding value with 95%CI. Note the different scaling of the y-axes in **A** and **B**.

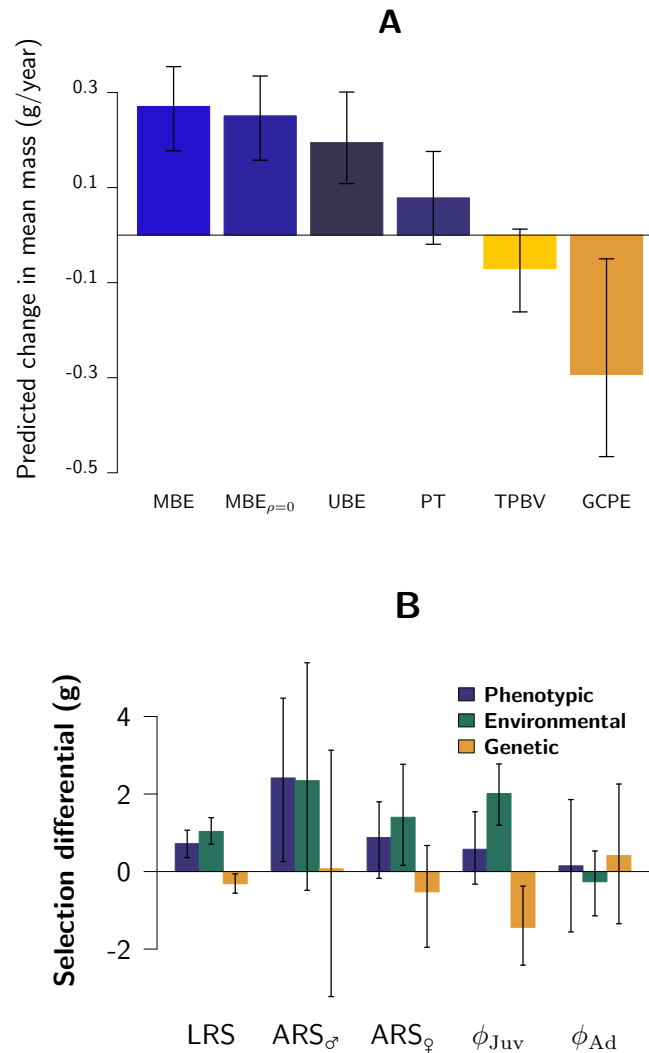

**Figure 2 Predicted and observed rates of evolutionary change. (A):** Rates of evolutionary change predicted by (from left to right) the breeder's equation in its multivariate form (MBE), the multivariate breeder's equation while constraining the genetic correlations to zero (MBE<sub>ρ=0</sub>), and the univariate breeder's equation (UBE), followed by the phenotypic trend (PT), the trend in predicted breeding values (TPBV) and the genetic change estimated by the Price equation (GCPE). **(B):** Phenotypic, genetic and environmental selection differential for total selection (LRS), fertility selection in males (ARS<sub>σ</sub>) and females (ARS<sub>♀</sub>), viability selection in juveniles (φ<sub>Juv</sub>) and in adults (φ<sub>A</sub>). Both panels show posterior modes, with vertical lines indicating 95%CI.

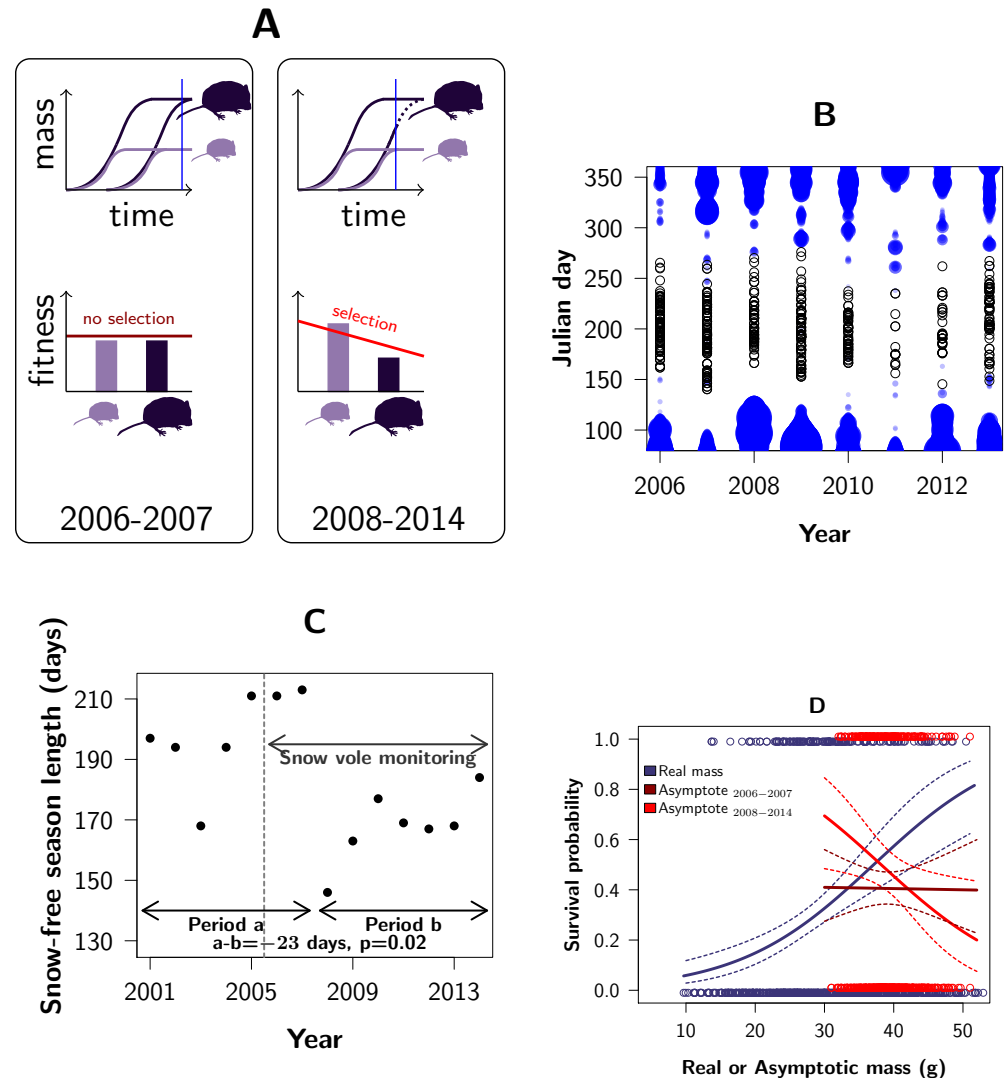

**Figure 3 Snow-free season, timing of reproduction and selection for potential adult mass.** (A) Hypothetical scenario generating selection for lower body mass: In years with short summers (2008-2014), juveniles born late and having a large potential adult mass are still growing at the onset of winter and therefore less likely to survive (blue vertical line). This results in selection for individuals with a low potential adult mass, despite mass covarying positively with survival on a within-individual level due to variation in age. (B) Births (black dots) only occur during the snow free season (the depth of the snow cover is indicated by the thickness of the blue dots), (C): which in 2008-2014 has been shorter than in the preceding 7 year. Therefore, (D) despite a positive phenotypic selection on body mass (blue), predicted adult mass was selectively neutral in 2006-2007 (brown), and was negatively selected in 2008-2014 (red).
